# Supplementary material for: Resurgence of Pertussis Infections in Shandong, China: Space-Time Cluster and Trend Analysis
Source: PubMed Central journal article supplement (PMC6553910; doi:10.4269/ajtmh.19-0013), 2019-04-15
Supplement: tpmd190013.SD1.pdf [file tpmd190013.SD1.pdf]

The following are supplemental materials and will be published online only

## Supplementary information

### Resurgence of pertussis infections in Shandong, China: Space-time cluster and trend analysis

邵 州 张

Yuzhou Zhang, Hilary Bambrick, Kerrie Mengersen, Shilu Tong, Lei Feng, Li Zhang, Guifang Liu, Aiqiang Xu and Wenbiao Hu

邵 州 张 一 莉 一 莉 一 莉

School of Public Health and Social Work; Institute of Health and Biomedical Innovation, Queensland University of Technology, Brisbane, Queensland, Australia. (Yuzhou Zhang: yuzhou.zhang@hdr.qut.edu.au; Hilary Bambrick: h.bambrick@qut.edu.au; Shilu Tong: s.tong@qut.edu.au; Wenbiao Hu: w2.hu@qut.edu.au)

School of Mathematical Sciences, Queensland University of Technology, Brisbane, Queensland, Australia. (Kerrie Mengersen: k.mengersen@qut.edu.au)

School of Public Health and Institute of Environment and Human Health, Anhui Medical University, Hefei, Anhui, China. (Shilu Tong: s.tong@ahmu.edu.cn)

Shanghai Children's Medical Centre, Shanghai Jiao-Tong University, Shanghai, China. (Shilu Tong: tongshilu@scmc.com.cn)

Shandong Provincial Centre of Disease Control and Prevention, Jinan, China. (Lei Feng: tammyfenglei@163.com; Li Zhang: ZL9127@163.com; Guifang Liu: liu-guifang@163.com; Aiqiang Xu: aqxuepi@163.com)

文彪胡, 公共卫生与医学博士

Wenbiao Hu, School of Public Health and Social Work; Institute of Health and Biomedical Innovation, Queensland University of Technology, Brisbane, Queensland, Australia. Phone: +61 31385724 Email: w2.hu@qut.edu.au;

**Figure 1. Spatial distributions of the relative risks at county level across Shandong province, 2009-2017 (A: study period 2009-2017, B: period 1, C: period 2, D: period 3).**

A

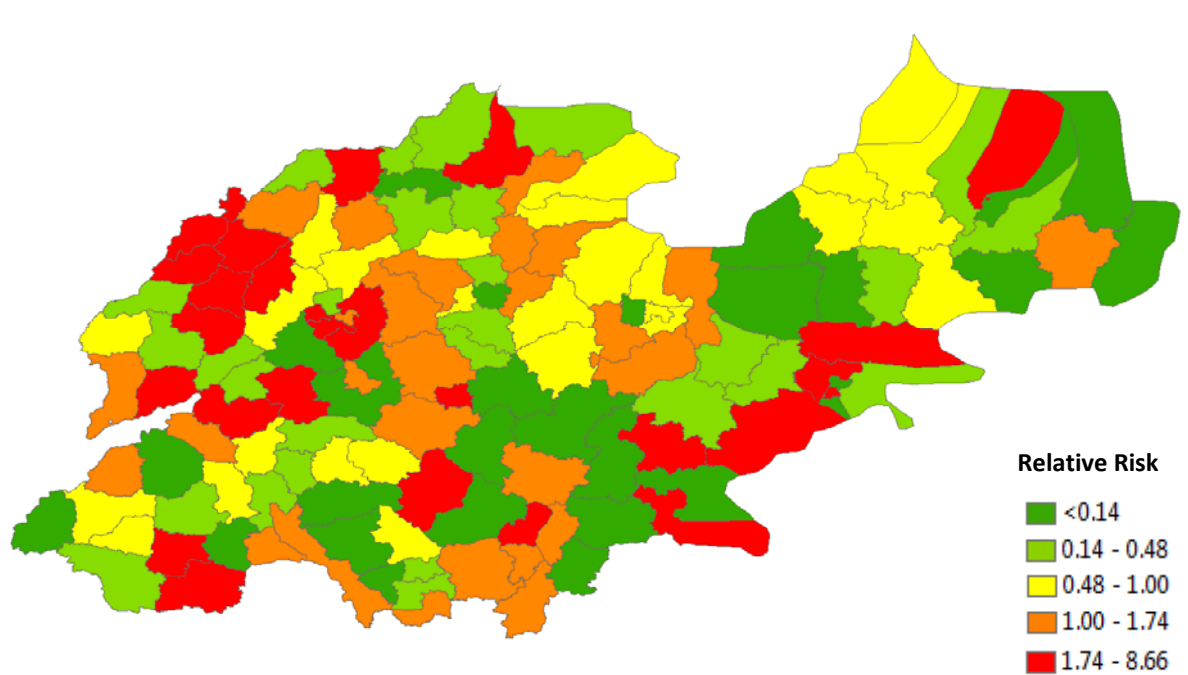

B

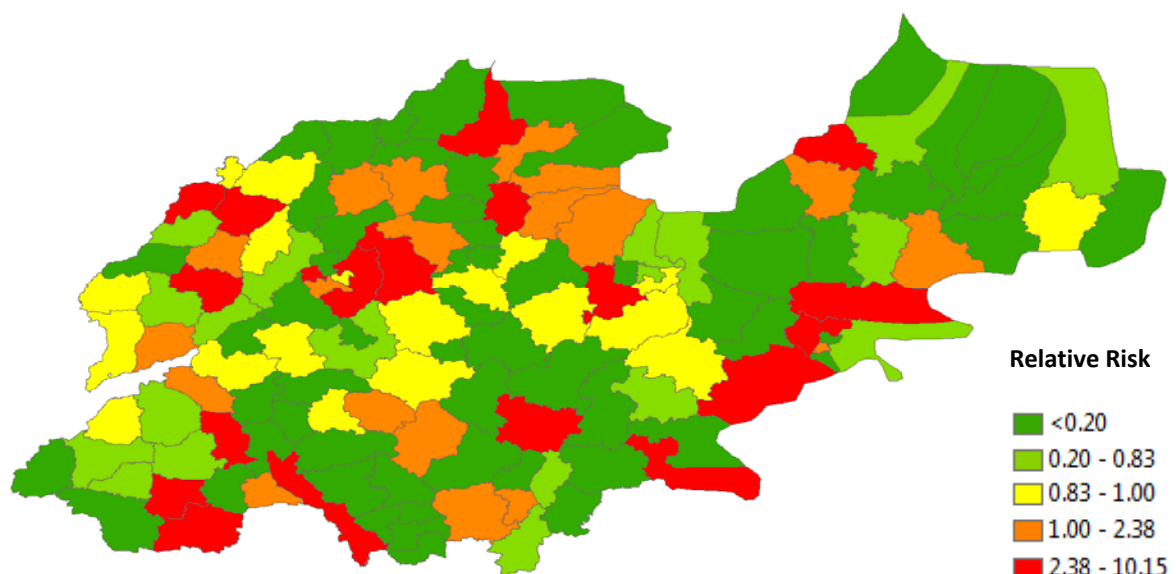

C

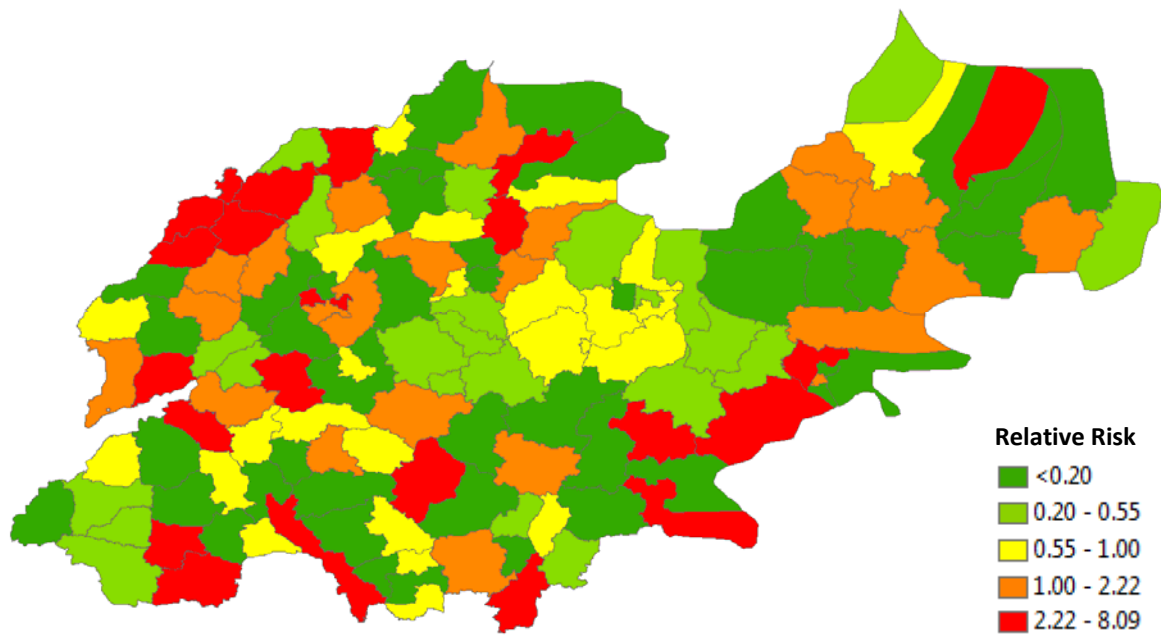

D

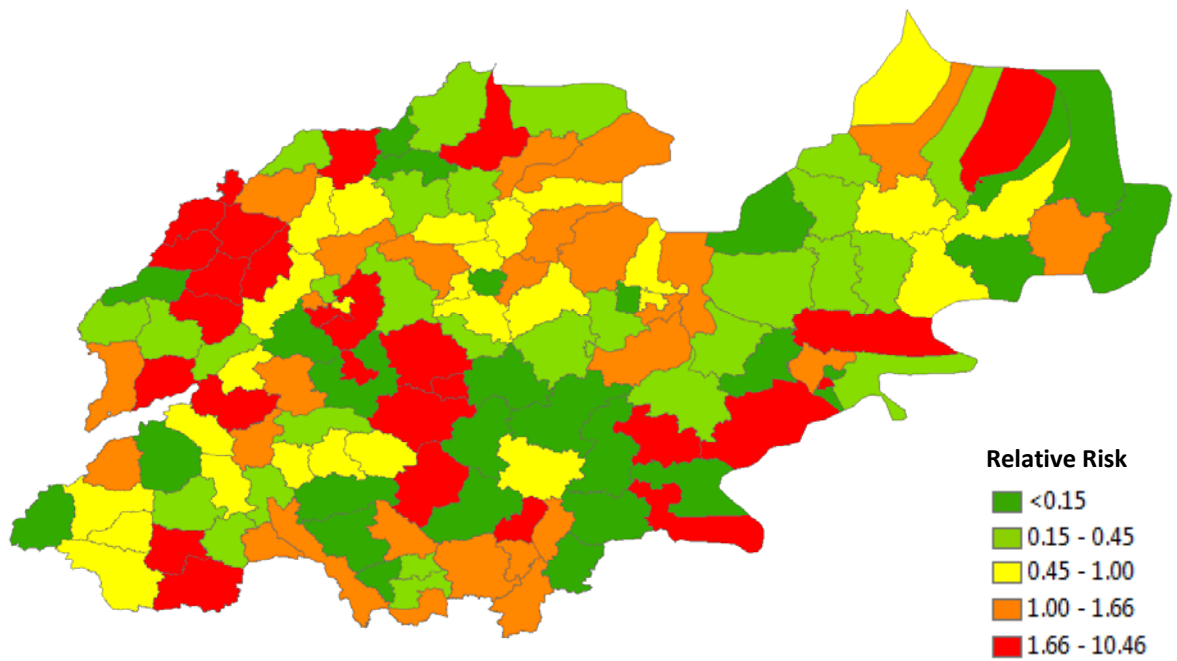

**Figure 2. The regression tree modeling the hierarchical relationship between the differences of yearly mean pertussis incidence between periods with the locations of counties in Shandong, 2009-2017.** (The regression tree shows the threshold values, mean differences in yearly average pertussis incidence between periods, N is the total number of counties; A: difference between period 1 and 3, B: difference between period 1 and 2, C: difference between period 2 and 3)

**A**

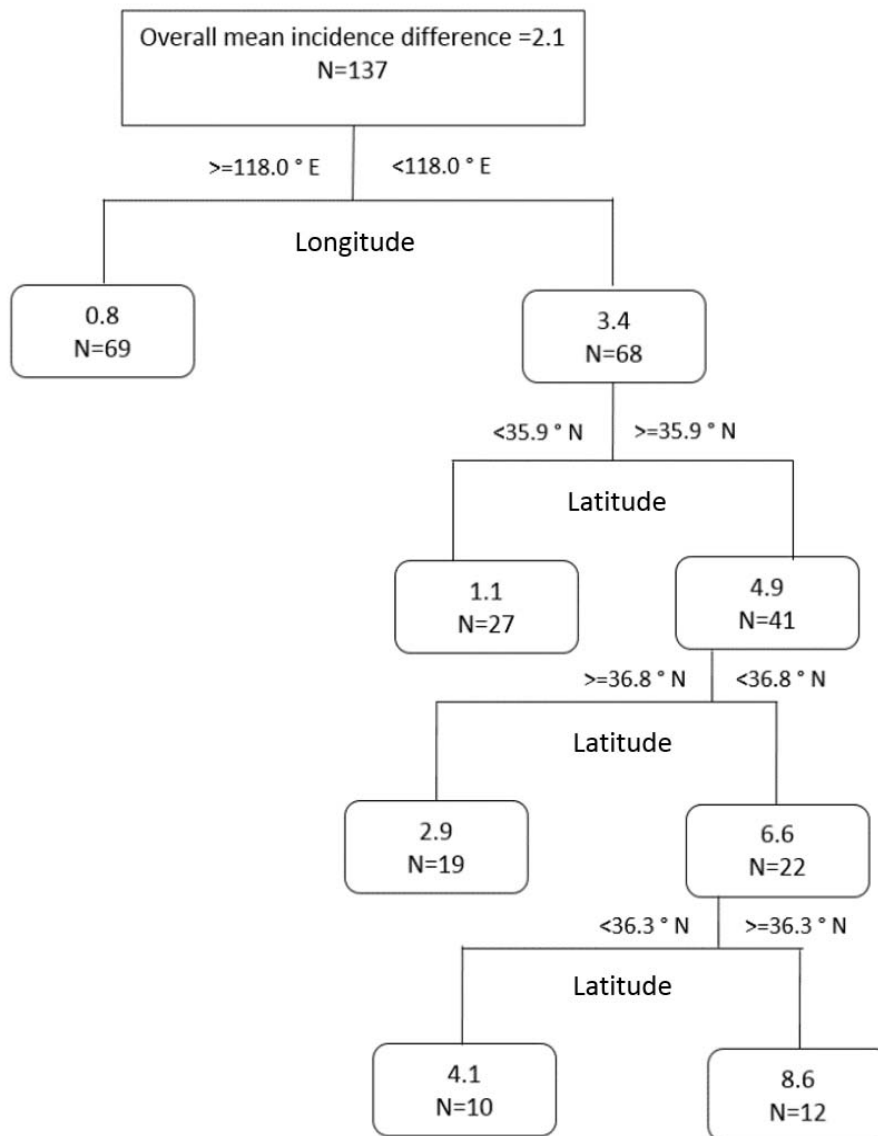

**B**

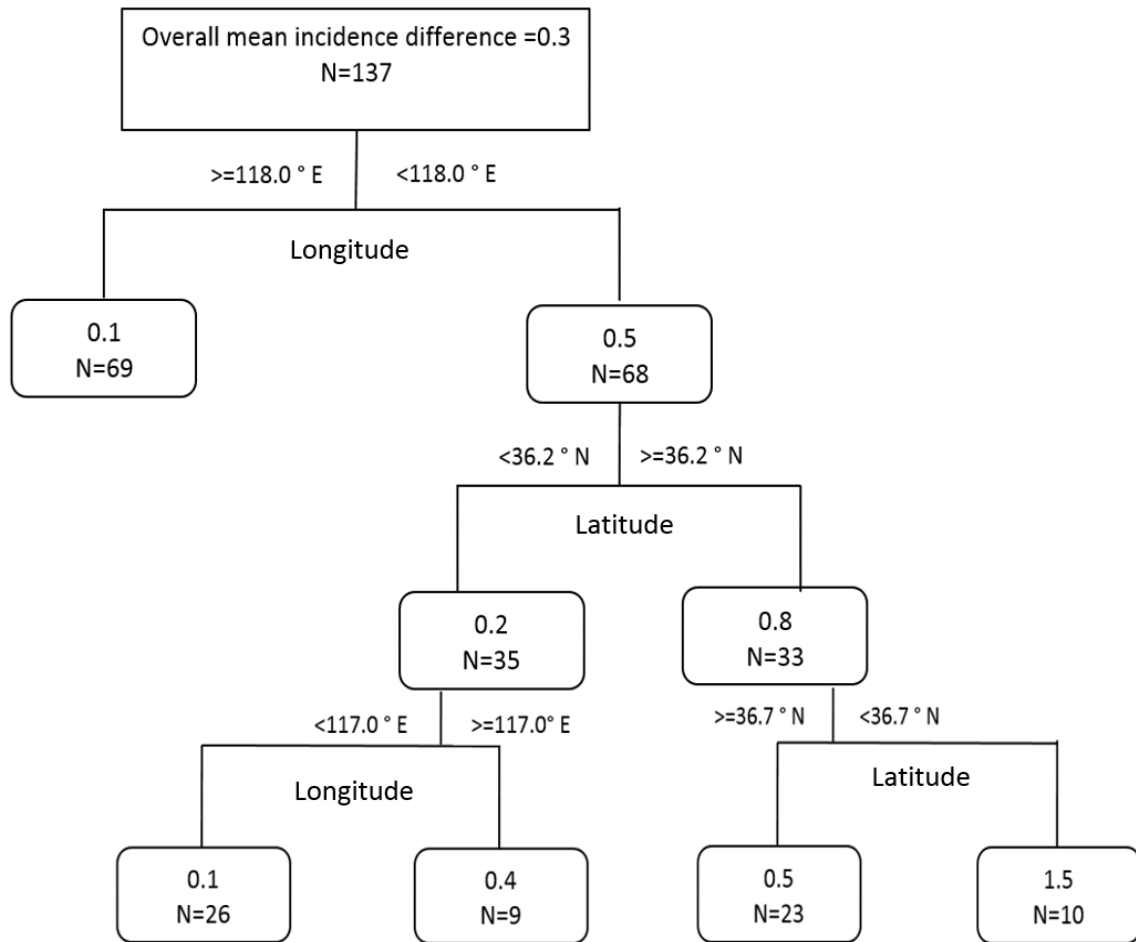

C

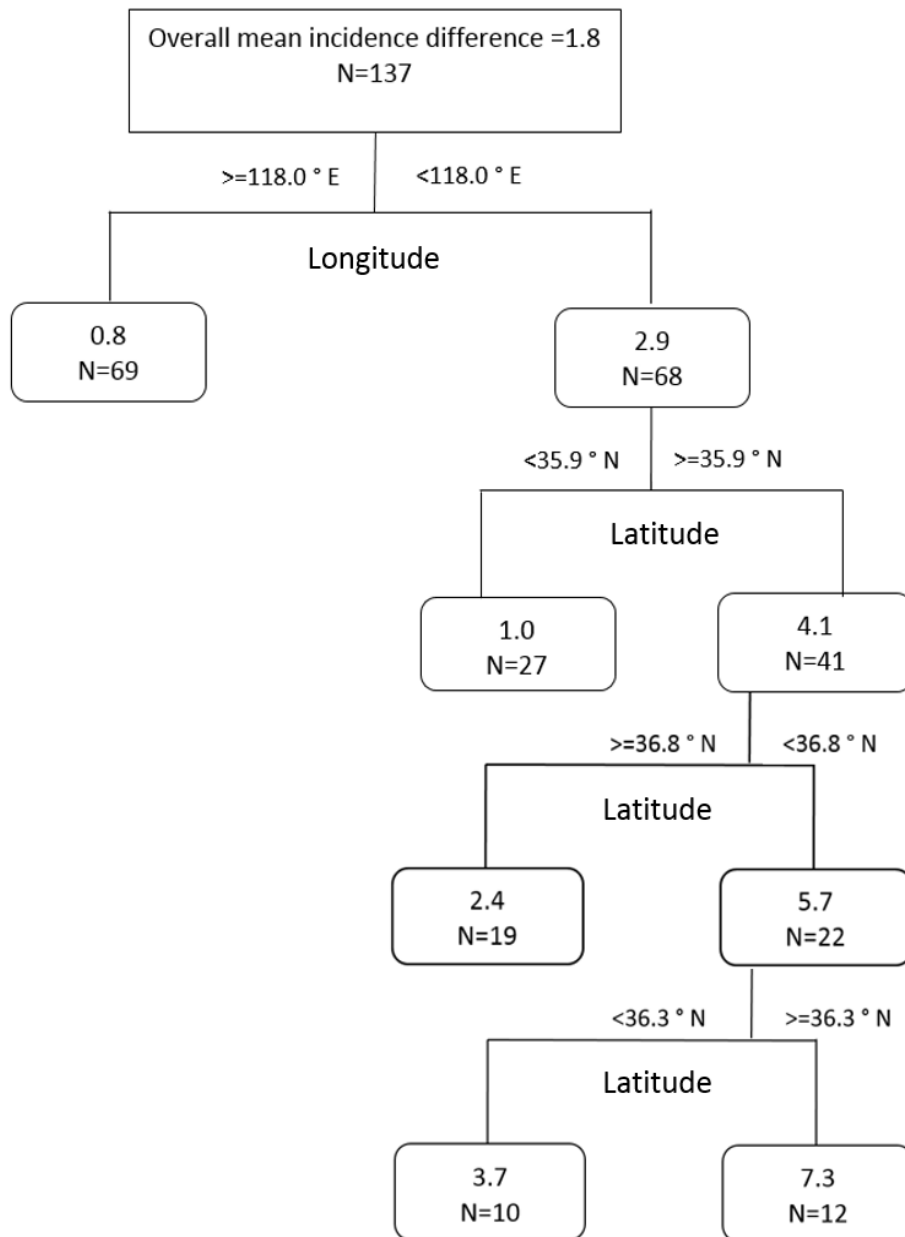

### **The definition of Relative Risk in the study**

For Shandong province  $A$  under study, the RR is defined to be the infection risk  $\lambda_Z$  of county  $Z$  compared to the risk  $\lambda_{A/Z}$  in all other counties  $A/Z$ . Let

$$\lambda_Z = E(Y_Z) / E_Z,$$

$$E_Z = N * P_Z / P_+,$$

where  $Y_Z$  is the Poisson random variable of pertussis notifications in county  $Z$ , with expected cases given by  $E(Y_Z)$ ,  $E_Z$  is the observed number of cases in county  $Z$ ,  $P_Z$  is the population of county  $Z$ ,  $P_+$  is the total population at risk in the province and  $N$  is the total number of notifications. Analogously we define  $\lambda_{A/Z}$ . This way, the RR is defined as  $RR = \lambda_Z / \lambda_{A/Z}$ .
